# Supplementary material for: Host and Phenology Shifts in the Evolution of the Social Moth Genus Thaumetopoea
Source: PubMed Central journal article supplement (PMC3584119; doi:10.1371/journal.pone.0057192), 2013-02-27
Supplement: pone.0057192.s001.pdf [file pone.0057192.s001.pdf]

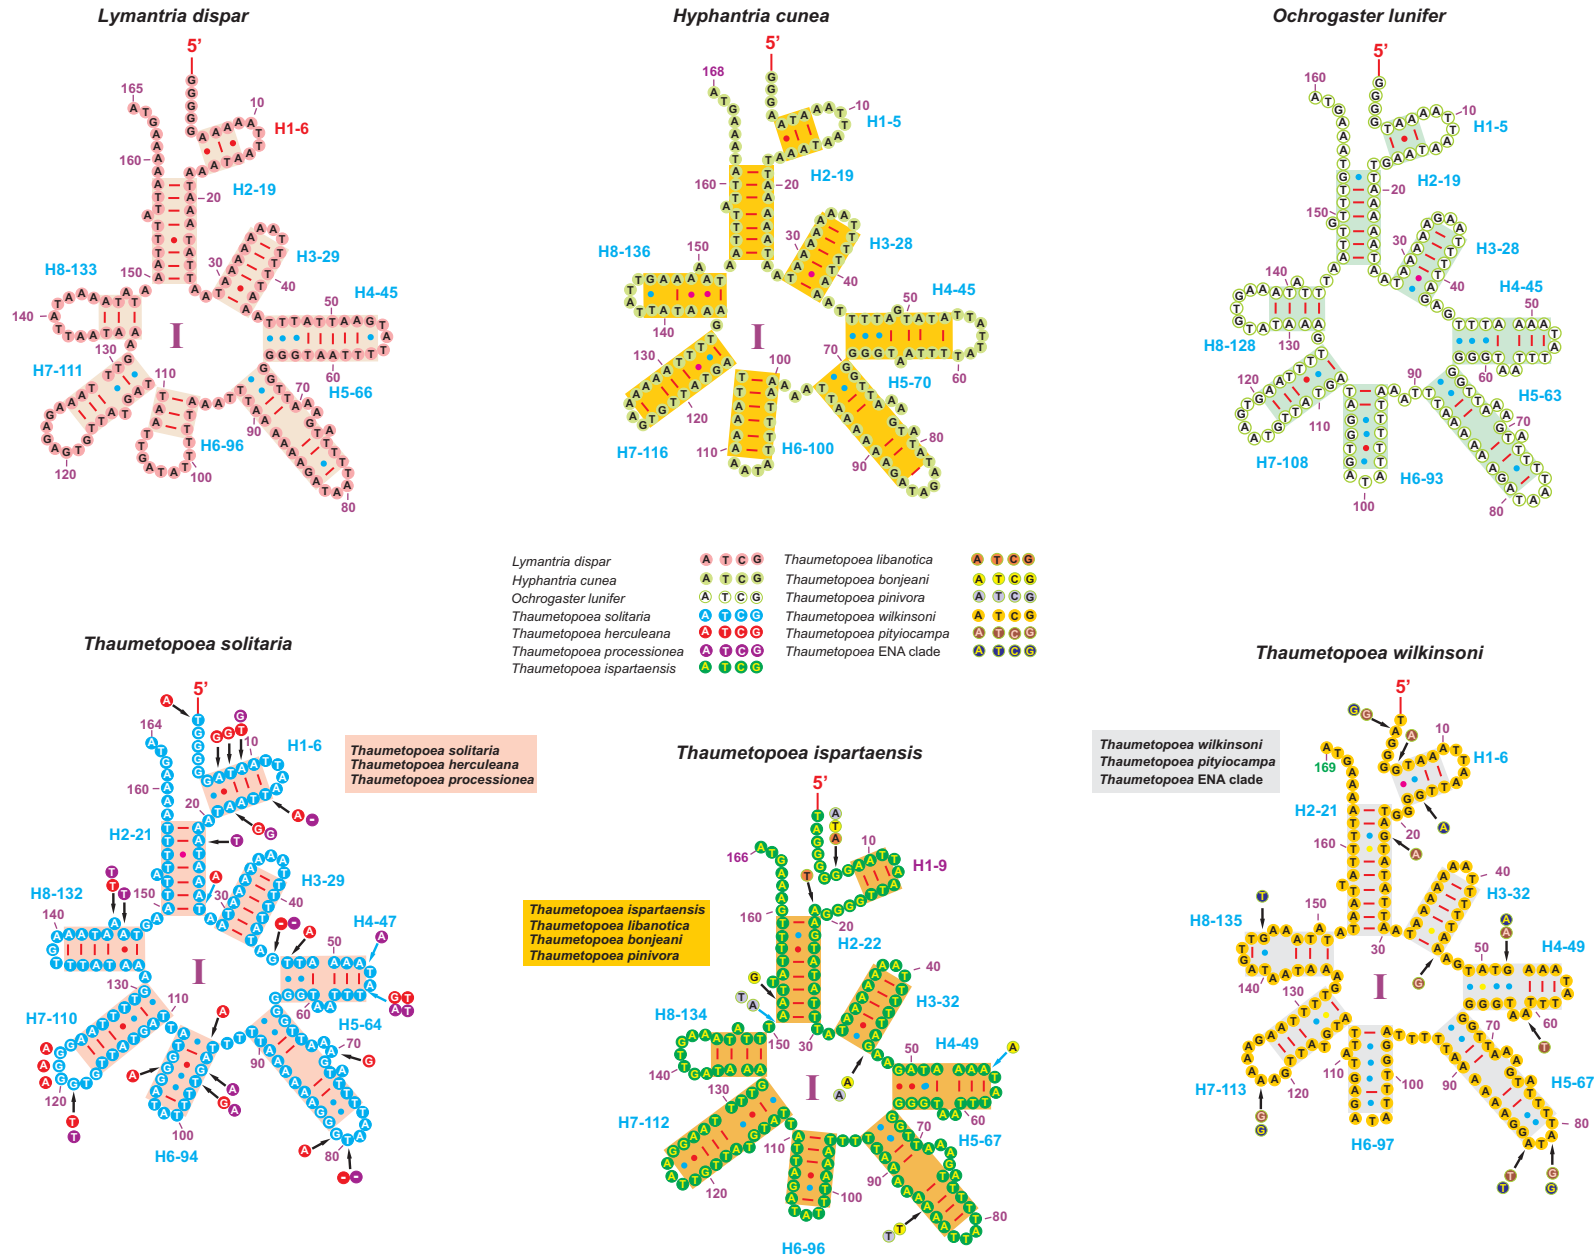

Figure S1. The secondary structure of *rrnL* domain I in Noctuoidea moths.
