# Supplementary material for: Host and Phenology Shifts in the Evolution of the Social Moth Genus Thaumetopoea
Source: PubMed Central journal article supplement (PMC3584119; doi:10.1371/journal.pone.0057192), 2013-02-27
Supplement: pone.0057192.s003.pdf [file pone.0057192.s003.pdf]

Table S1.A.1 PCR conditions used for mitochondrial genes

| <i>Thaumetopoea bonjeani</i>   | FW primer   | RV primer  | MIX | AT (°C) | EXT   | n° cycles |
|--------------------------------|-------------|------------|-----|---------|-------|-----------|
|                                | TFJ6400     | MPE_a_nad5 | 1   | 55      | 1'30" | 35        |
|                                | allnd5form  | MPE_a_nad5 | 1   | 50      | 1'45" | 35        |
|                                | nad5pbihF   | nad5pbihR  | 1   | 55      | 1'    | 35        |
|                                | N5J7572     | N4N8727    | 1   | 53      | 1'45" | 35        |
|                                | pf7925      | pr8776     | 1   | 55      | 1'30" | 35        |
|                                | CBJ10933    | CBN11367   | 1   | 58      | 1'    | 35        |
|                                | CBJ10933    | TS1N11683  | 1   | 52      | 1'    | 35        |
|                                | CBJ11485    | N1N12442   | 1   | 54      | 1'30" | 35        |
|                                | N1J12261m   | LRN13000   | 2   | 52      | 1'    | 35        |
|                                | LRJ12887    | LRN13398   | 1   | 58      | 1'    | 35        |
|                                | eoeh110for  | OC10rr     | 2   | 48      | 1'30" | 35        |
|                                | SRJ14197    | SRN14745   | 1   | 54      | 1'30" | 35        |
|                                | SRJ14233    | SRN14588   | 1   | 60      | 30"   | 35        |
|                                | pB12Sfor    | pB12Srev   | 1   | 53      | 1'    | 35        |
|                                | LCO1490     | HCO2198    | 1   | 50      | 1'    | 35        |
|                                | C1J1718     | C1N2353    | 1   | 50      | 1'    | 35        |
|                                | C1J1751     | TL2N3014   | 1   | 48      | 2'    | 35        |
|                                | allC1J1922  | allC1N3120 | 1   | 52      | 1'30" | 35        |
|                                | C1J2441     | C2N3661    | 1   | 52      | 1'30" | 35        |
|                                | C1J2792     | TKN3796    | 1   | 49      | 1'30" | 40        |
|                                | C2for2      | A6N4552m   | 2   | 57      | 1'30" | 35        |
|                                | C2J3624     | C3N4908    | 1   | 52      | 1'30" | 35        |
| <i>Thaumetopoea herculeana</i> | FW primer   | RV primer  | MIX | AT (°C) | EXT   | n° cycles |
|                                | TFJ6400     | MPE_a_nad5 | 1   | 55      | 1'30" | 35        |
|                                | N5J7572     | N4N8727    | 1   | 53      | 1'45" | 35        |
|                                | nad5hwF     | nad5hwR    | 1   | 55      | 1'    | 35        |
|                                | pf7925      | pr8776     | 1   | 55      | 1'30" | 35        |
|                                | CBJ10933    | CBN11367   | 1   | 58      | 1'    | 35        |
|                                | ochlnad1for | allnd1rev  | 1   | 57      | 1'40" | 35        |
|                                | CBJ11335    | allnd1rev  | 1   | 57      | 1'40" | 35        |
|                                | CBJ11545    | LRN12866   | 1   | 57      | 1'30" | 35        |
|                                | OC7rr       | allnd1rev  | 1   | 54      | 1'30" | 35        |
|                                | pth1612SAf  | pth1612SAr | 1   | 58      | 1'45" | 35        |
|                                | N1J12261m   | 071105rev5 | 1   | 55      | 1'    | 35        |
|                                | pth1612SBf  | pth1612SBr | 1   | 58      | 1'45" | 35        |
|                                | SRJ14197    | TMN200     | 1   | 61      | 2'    | 35        |
|                                | SRJ14233    | SRN14588   | 1   | 52      | 1'    | 30        |
|                                | LCO1490     | HCO2198    | 1   | 50      | 1'    | 35        |
|                                | allC1J1922  | allC1N3120 | 1   | 52      | 1'30" | 35        |
|                                | C1J2441     | TKN3785    | 1   | 50      | 2'    | 35        |

Table S1.A.2 PCR conditions used for mitochondrial genes

| <i>Thaumetopoea herculeana</i>   | FW primer     | RV primer    | MIX | AT (°C) | EXT   | n° cycles |
|----------------------------------|---------------|--------------|-----|---------|-------|-----------|
|                                  | C2J3399       | A8N4061      | 1   | 50      | 1'    | 35        |
|                                  | TKJ3790       | C3N4908      | 1   | 53      | 1'45" | 35        |
|                                  | allco1for     | allco3rev    | 1   | 61      | 2'30" | 40        |
| <i>Thaumetopoea ispartaensis</i> | FW primer     | RV primer    | MIX | AT (°C) | EXT   | n° cycles |
|                                  | TFJ6400       | MPE_a_nad5   | 1   | 55      | 1'30" | 35        |
|                                  | TFJ6400       | N5N7793      | 1   | 54      | 1'45" | 35        |
|                                  | allnd5form    | MPE_a_nad5   | 1   | 50      | 1'45" | 35        |
|                                  | N5J7572       | N4N8727      | 1   | 53      | 1'45" | 35        |
|                                  | tisp0710nd5f  | tisp0710nd5r | 1   | 52      | 45"   | 35        |
|                                  | nad5pbihF     | nad5pbihR    | 1   | 55      | 1'    | 35        |
|                                  | pf7925        | pr8776       | 1   | 55      | 1'30" | 35        |
|                                  | CBJ10933      | N1N12595     | 1   | 52      | 1'45" | 40        |
|                                  | CBJ10933      | allnd1rev    | 2   | 57      | 1'30" | 35        |
|                                  | N1J12261m     | LRN13000     | 2   | 52      | 1'    | 35        |
|                                  | LRJ12888      | LRN13398     | 1   | 57      | 1'    | 35        |
|                                  | ochl16S12Sfor | OC10rr       | 1   | 62      | 1'15" | 35        |
|                                  | LRJ12888      | OC10rr       | 1   | 61      | 1'30" | 35        |
|                                  | 071105for1    | 071105rev2   | 1   | 55      | 1'30" | 35        |
|                                  | LRJ13900      | SRN14745     | 1   | 57      | 1'30" | 35        |
|                                  | pB12Sfor      | pB12Srev     | 1   | 53      | 1'    | 35        |
|                                  | LCO1490       | HCO2198      | 1   | 50      | 1'    | 35        |
|                                  | C1J1718       | C1N2353      | 1   | 50      | 1'    | 35        |
|                                  | C1J1718       | C1N2776      | 1   | 52      | 1'    | 35        |
|                                  | allC1J1922    | allC1N3120   | 1   | 52      | 1'30" | 35        |
|                                  | C1J2441       | TKN3785      | 1   | 50      | 2'    | 35        |
|                                  | C1J2441       | C2N3661      | 1   | 52      | 1'30" | 35        |
|                                  | C2J3399       | A8N4061      | 1   | 48      | 1'    | 35        |
|                                  | C2J3624       | C3N4908      | 1   | 52      | 2'    | 35        |
|                                  | eochl14for    | eochl14rev   | 1   | 54      | 2'    | 35        |
|                                  | TKJ3790       | C3N4908      | 1   | 62      | 2'    | 35        |
| <i>Thaumetopoea libanotica</i>   | FW primer     | RV primer    | MIX | AT (°C) | EXT   | n° cycles |
|                                  | TFJ6400       | N5N7211m     | 1   | 55      | 1'45" | 35        |
|                                  | allnd5form    | MPE_a_nad5   | 1   | 50      | 1'45" | 35        |
|                                  | pf7925        | pr8776       | 1   | 55      | 1'30" | 35        |
|                                  | N5J7572       | N4N8727      | 1   | 53      | 1'45" | 35        |
|                                  | N5J7806       | N4N8727      | 1   | 57      | 1'45" | 35        |
|                                  | CBJ10933      | allnd1rev    | 2   | 57      | 1'30" | 35        |
|                                  | CBJ10933      | allcobrev    | 1   | 55      | 45"   | 35        |
|                                  | CBJ10933      | N1N12595     | 1   | 52      | 1'45" | 40        |

Table S1.A.3 PCR conditions used for mitochondrial genes

| <i>Thaumetopoea libanotica</i> | FW primer     | RV primer    | MIX | AT (°C) | EXT   | n° cycles |
|--------------------------------|---------------|--------------|-----|---------|-------|-----------|
|                                | CBJ11335      | N1N12442     | 1   | 54      | 1'30" | 35        |
|                                | nd1micro      | ochl7rev     | 1   | 58      | 45"   | 35        |
|                                | N1J12261m     | LRN13000     | 2   | 52      | 1'    | 35        |
|                                | LRJ12888      | LRN13398     | 1   | 57      | 1'    | 35        |
|                                | LRJ12888      | OC10rr       | 1   | 61      | 1'30" | 35        |
|                                | ochl16S12Sfor | OC10rr       | 1   | 62      | 1'15" | 35        |
|                                | SRJ14197      | SRN14745     | 1   | 54      | 1'30" | 35        |
|                                | pB12Sfor      | pB12Srev     | 1   | 53      | 1'    | 35        |
|                                | 071105for1    | 071105rev2   | 1   | 55      | 1'30" | 35        |
|                                | LCO1490       | HCO2198      | 1   | 50      | 1'    | 35        |
|                                | LCO1490       | C1N2353      | 1   | 56      | 1'    | 35        |
|                                | allC1J1922    | allC1N3120   | 1   | 52      | 1'30" | 35        |
|                                | C1J2183       | C2N3661      | 1   | 48      | 2'    | 35        |
|                                | C1J2441       | C2N3661      | 1   | 52      | 1'30" | 35        |
|                                | C1J2441       | TKN3785      | 1   | 50      | 2'    | 35        |
|                                | allco1for     | allco3rev    | 1   | 61      | 2'30" | 40        |
|                                | TKJ3790       | C3N4908      | 1   | 62      | 2'    | 35        |
| <i>Thaumetopoea pinivora</i>   | FW primer     | RV primer    | MIX | AT (°C) | EXT   | n° cycles |
|                                | PRND51r       | N4N8727      | 1   | 54      | 2'30" | 35        |
|                                | allnd5form    | MPE_a_nad5   | 1   | 50      | 1'45" | 35        |
|                                | nad5pbihF     | nad5pbihR    | 1   | 55      | 1'    | 35        |
|                                | N5J7572       | N4N8727      | 1   | 53      | 1'45" | 35        |
|                                | pf7925        | pr8776       | 1   | 55      | 1'30" | 35        |
|                                | CBJ10933      | CBN11367     | 1   | 58      | 1'    | 35        |
|                                | nd1micro      | 12Srev2      | 1   | 50      | 1'    | 35        |
|                                | OC7rr         | allnd1rev    | 1   | 54      | 1'30" | 35        |
|                                | tpin0710cobf  | tpin0710cobr | 1   | 52      | 45"   | 35        |
|                                | CBJ11335      | N1N12442     | 1   | 54      | 1'30" | 35        |
|                                | CBJ11545      | LRN12866     | 1   | 57      | 1'30" | 35        |
|                                | LRJ12887      | LRN13398     | 1   | 58      | 1'    | 35        |
|                                | LRJ12888      | OC10rr       | 1   | 61      | 1'30" | 35        |
|                                | 16Sfor2       | 12Srev2      | 1   | 50      | 1'30" | 35        |
|                                | N1J12261m     | LRN13000     | 2   | 52      | 1'    | 35        |
|                                | ochl16S12Sfor | SRN14220     | 1   | 61      | 1'30" | 35        |
|                                | SRJ14233      | SRN14588     | 1   | 52      | 1'    | 30        |
|                                | LRJ13342      | SRN14745     | 2   | 52      | 2'    | 35        |
|                                | SRJ14197      | TMN200       | 1   | 61      | 2'    | 35        |
|                                | LCO1490       | HCO2198      | 1   | 50      | 1'    | 35        |
|                                | C1J1718       | TL2N3014     | 1   | 48      | 1'30" | 35        |
|                                | allC1J1922    | allC1N3120   | 1   | 52      | 1'30" | 35        |

Table S1.A.4 PCR conditions used for mitochondrial genes

| <i>Thaumetopoea pinivora</i>   | FW primer   | RV primer   | MIX | AT (°C) | EXT   | n° cycles |
|--------------------------------|-------------|-------------|-----|---------|-------|-----------|
|                                | C1J2183     | TKN3772     | 1   | 52      | 2'    | 35        |
|                                | C1J2441     | TKN3785     | 1   | 50      | 2'    | 35        |
|                                | C1J2441     | C2N3661     | 1   | 52      | 1'30" | 35        |
|                                | allC2J3505  | A6N4552m    | 1   | 55      | 1'30" | 35        |
|                                | A6J4463     | COIIIrev    | 1   | 55      | 1'15" | 35        |
|                                | allco1for   | allco3rev   | 1   | 61      | 2'30" | 40        |
|                                | C3if        | C3ir        | 1   | 55      | 1'    | 35        |
|                                | TpinA6C3for | TpinA6C3rev | 1   | 50      | 1'    | 35        |
| <i>Theumetopoea pityocampa</i> | FW primer   | RV primer   | MIX | AT (°C) | EXT   | n° cycles |
|                                | TFJ6400     | N5N7793     | 1   | 48      | 2'30" | 35        |
|                                | PRND51R     | N4N8727     | 1   | 56      | 2'30" | 30        |
|                                | N5J7077     | N4N8727     | 1   | 51      | 1'    | 35        |
|                                | N5J7806     | N4N8727     | 1   | 52      | 1'30" | 35        |
|                                | ochlNAD5for | N4N8727     | 1   | 48      | 45"   | 35        |
|                                | CBJ10933    | N1N12595    | 1   | 52      | 2'    | 35        |
|                                | CBJ11335    | N1N12442    | 1   | 52      | 1'    | 35        |
|                                | CBJ11545    | LRN12866    | 2   | 49      | 1'    | 35        |
|                                | N1J12261m   | LRN13000    | 1   | 62      | 2'    | 35        |
|                                | ochlcobF1   | LRN12866    | 1   | 56      | 1'45" | 35        |
|                                | ochlNAD1for | ochl16Srev  | 1   | 55      | 1'    | 35        |
|                                | N1J12261m   | SRN14220    | 2   | 50      | 1'45" | 40        |
|                                | N1J12585m   | SRN14220    | 1   | 52      | 2'    | 35        |
|                                | LRJ12888    | SRN14220    | 1   | 55      | 1'30" | 35        |
|                                | LRJ13342    | SRN14745    | 1   | 56      | 2'    | 35        |
|                                | SRJ14197    | TMN200      | 1   | 56      | 1'45" | 35        |
|                                | LCO1490     | HCO2198     | 1   | 56      | 2'30" | 30        |
|                                | C1J1718     | TL2N3014    | 1   | 53      | 2'    | 35        |
|                                | C1J1718     | C1N2353     | 1   | 56      | 1'45" | 35        |
|                                | C1J1751     | C2N3661     | 1   | 53      | 2'    | 35        |
|                                | allC1J1922  | allC1N3120  | 1   | 53      | 2'    | 35        |
|                                | C1J2183     | C1N2659     | 1   | 61      | 1'30" | 35        |
|                                | C1J2441     | C2N3661     | 1   | 54      | 1'30" | 35        |
|                                | C1J2441     | TKN3785     | 1   | 57      | 2'    | 35        |
|                                | C2J3399     | A8N4061     | 1   | 55      | 1'    | 35        |
|                                | allC2J3505  | A8N4061     | 1   | 50      | 1'    | 30        |
|                                | TKJ3790     | Tpina6c3rev | 1   | 54      | 2'30" | 35        |
|                                | C3if        | C3ir        | 1   | 56      | 2'30" | 30        |
|                                | TKJ3790     | C3N4908     | 1   | 58      | 45"   | 35        |

Table S1.A.5 PCR conditions used for mitochondrial genes

| <i>Thaumetopoea pityocampa</i> ENA | FW primer      | RV primer      | MIX | AT (°C) | EXT   | n° cycles |
|------------------------------------|----------------|----------------|-----|---------|-------|-----------|
|                                    | ttun6600       | ttun7806       | 1   | 54      | 1'15" | 35        |
|                                    | allnd5form     | MPE_a_nad5     | 1   | 50      | 1'45" | 35        |
|                                    | allnd5form     | allnd4rev      | 1   | 55      | 1'30" | 35        |
|                                    | N5J7806        | N4N8727        | 1   | 55      | 2'    | 35        |
|                                    | CBJ10612       | CBN11010       | 1   | 58      | 1'30" | 35        |
|                                    | tuncobforbis   | tuncobrevbis   | 1   | 54      | 1'    | 35        |
|                                    | CBJ11335       | allnd1rev      | 1   | 55      | 1'30" | 35        |
|                                    | CBJ11545       | N1N12595       | 1   | 53      | 1'30" | 35        |
|                                    | CBJ11485       | allnd1rev      | 1   | 55      | 1'30" | 35        |
|                                    | ochl16S12Sfor  | SRN14220       | 1   | 61      | 1'30" | 35        |
|                                    | LRJ12887       | LRN13398       | 1   | 58      | 1'    | 35        |
|                                    | ttun13206      | ttun13740      | 2   | 60      | 1'    | 35        |
|                                    | LRJ13342       | SRN14220       | 1   | 60      | 1'    | 35        |
|                                    | LRJ13900       | SRN14588       | 1   | 60      | 1'    | 35        |
|                                    | LRJ13900       | SRN14220       | 1   | 60      | 1'    | 35        |
|                                    | pther1612for   | pther1612rev   | 1   | 54      | 1'30" | 35        |
|                                    | SRJ14197       | SRN14745       | 1   | 54      | 1'30" | 35        |
|                                    | SRJ14197       | TMN200         | 1   | 61      | 2'    | 35        |
|                                    | SRJ14610       | TMN200         | 1   | 60      | 1'    | 35        |
|                                    | LCO1490        | HCO2198        | 1   | 50      | 1'    | 35        |
|                                    | C1J1718        | C1N2353        | 1   | 50      | 1'    | 35        |
|                                    | C1J1718        | TL2N3014       | 1   | 55      | 1'30" | 35        |
|                                    | allC1J1922     | allC1N3120     | 1   | 52      | 1'30" | 35        |
|                                    | C1J2792        | TKN3796        | 1   | 49      | 1'30" | 40        |
|                                    | TKJ3790        | C3N4908        | 1   | 54      | 1'30" | 35        |
|                                    | ttun3900       | ttun4540       | 2   | 60      | 1'    | 35        |
| <i>Thaumetopoea processionea</i>   | FW primer      | RV primer      | MIX | AT (°C) | EXT   | n° cycles |
|                                    | TFJ6400        | trnand5rev     | 1   | 53      | 2'    | 35        |
|                                    | PRND51R        | N4N8727        | 1   | 54      | 2'30" | 35        |
|                                    | N5J7077        | N4N8727        | 1   | 51      | 1'45" | 35        |
|                                    | allnd5form     | MPE_a_nad5     | 1   | 50      | 1'45" | 35        |
|                                    | N5J7572        | N4N8727        | 1   | 53      | 1'45" | 35        |
|                                    | pf7925         | pr8776         | 1   | 55      | 1'30" | 35        |
|                                    | CBJ10612       | CBN11010       | 1   | 58      | 1'30" | 35        |
|                                    | CBJ10933       | TS1N11683      | 1   | 52      | 1'    | 30        |
|                                    | tpea_0710nd5f  | tpea_0710nd5r  | 1   | 55      | 1'    | 35        |
|                                    | CBJ11335       | N1N12442       | 1   | 55      | 1'30" | 35        |
|                                    | tpea_0710cob2f | tpea_0710cob2r | 1   | 55      | 1'    | 35        |
|                                    | N1J12261m      | LRN12866       | 1   | 61      | 2'    | 35        |
|                                    | N1J12261m      | LRN13000       | 2   | 52      | 2'    | 35        |

Table S1.A.6 PCR conditions used for mitochondrial genes

| <i>Thaumetopoea processionea</i> | FW primer  | RV primer  | MIX | AT (°C) | EXT   | n° cycles |
|----------------------------------|------------|------------|-----|---------|-------|-----------|
|                                  | LRJ12887   | LRN13398   | 1   | 52      | 1'    | 30        |
|                                  | LRJ12888   | 12Srev2    | 1   | 60      | 1'45" | 33        |
|                                  | 16Sfor2    | 12Srev2    | 1   | 50      | 1'30" | 35        |
|                                  | SRJ14197   | TMN200     | 1   | 61      | 2'    | 35        |
|                                  | SRJ14233   | SRN14588   | 1   | 52      | 1'    | 30        |
|                                  | LCO1490    | HCO2198    | 1   | 52      | 1'    | 30        |
|                                  | allC1J1922 | allC1N3120 | 1   | 52      | 1'30" | 35        |
|                                  | C1J2183    | TKN3772    | 1   | 52      | 2'    | 35        |
|                                  | C1J2441    | TKN3785    | 1   | 48      | 2'    | 35        |
|                                  | C2J3399    | A8N4061    | 1   | 52      | 1'    | 35        |
|                                  | TKJ3790    | C3N4908    | 1   | 62      | 2'    | 35        |
| <i>Thaumetopoea solitaria</i>    | FW primer  | RV primer  | MIX | AT (°C) | EXT   | n° cycles |
|                                  | TFJ6400    | MPE_a_nad5 | 1   | 55      | 1'30" | 35        |
|                                  | allnd5form | MPE_a_nad5 | 1   | 50      | 1'45" | 35        |
|                                  | pf7925     | pr8776     | 1   | 55      | 1'30" | 35        |
|                                  | N5J7572    | N4N8727    | 1   | 53      | 1'45" | 35        |
|                                  | N53f       | N4N8727    | 1   | 50      | 1'30" | 35        |
|                                  | CBJ11485   | N1N12442   | 1   | 50      | 1'30" | 35        |
|                                  | OC7rr      | allnd1rev  | 1   | 54      | 1'30" | 35        |
|                                  | nd1micro   | eoeh17rev  | 1   | 55      | 45"   | 35        |
|                                  | N1J12261m  | LRN13000   | 2   | 52      | 1'    | 35        |
|                                  | LRJ12888   | LRN13398   | 1   | 57      | 1'    | 35        |
|                                  | LRJ12888   | OC10rr     | 1   | 61      | 1'30" | 35        |
|                                  | eoeh19for  | OC10rr     | 1   | 54      | 1'15" | 35        |
|                                  | tsol16Sfor | tsol16Srev | 1   | 58      | 1'    | 35        |
|                                  | LCO1490    | HCO2198    | 1   | 50      | 1'    | 35        |
|                                  | SRJ14197   | TMN200     | 2   | 61      | 1'30" | 35        |
|                                  | C1J1751    | C1N2659    | 1   | 52      | 1'30" | 35        |
|                                  | allC1J1922 | allC1N3120 | 1   | 52      | 1'30" | 35        |
|                                  | C1J2441    | TKN3785    | 1   | 50      | 2'    | 35        |
|                                  | C1J2441    | C2N3661    | 1   | 52      | 1'30" | 35        |
|                                  | allC2J3505 | allC3N4923 | 2   | 55      | 1'30" | 35        |
|                                  | C3if       | C3ir       | 1   | 55      | 1'    | 35        |
|                                  | TKJ3790    | C3N4908    | 1   | 62      | 2'    | 35        |
| <i>Thaumetopoea wilkinsoni</i>   | FW primer  | RV primer  | MIX | AT (°C) | EXT   | n° cycles |
|                                  | PRND51R    | N4N8727    | 1   | 54      | 2'30" | 35        |
|                                  | allnd5form | MPE_a_nad5 | 1   | 50      | 1'45" | 35        |
|                                  | nad5hwF    | nad5hwR    | 1   | 55      | 1'    | 35        |

**Table S1.A.7 PCR conditions used for mitochondrial genes**

| <i>Thaumetopoea wilkinsoni</i> | FW primer       | RV primer       | MIX | AT (°C) | EXT   | n° cycles |
|--------------------------------|-----------------|-----------------|-----|---------|-------|-----------|
|                                | N53f            | N4N8727         | 1   | 50      | 1'30" | 35        |
|                                | N5J7572         | N4N8727         | 1   | 53      | 1'45" | 35        |
|                                | twilki0710nd5f  | twilki0710nd5r  | 1   | 52      | 1'    | 35        |
|                                | CBJ10933        | allnd1rev       | 2   | 57      | 1'30" | 35        |
|                                | CBJ11335        | allnd1rev       | 1   | 55      | 1'30" | 35        |
|                                | OC7rr           | allnd1rev       | 1   | 54      | 1'30" | 35        |
|                                | CBJ11545        | LRN12866        | 1   | 57      | 1'30" | 35        |
|                                | N1J12261m       | LRN13000        | 2   | 52      | 1'    | 35        |
|                                | twilki0710cobf  | twilki0710cobr  | 1   | 52      | 1'    | 35        |
|                                | LRJ12888        | LRN13398        | 1   | 57      | 1'    | 35        |
|                                | ochl16S12Sfor   | OC10rr          | 1   | 62      | 1'15" | 35        |
|                                | SRJ14197        | TMN200          | 1   | 61      | 2'    | 35        |
|                                | LCO1490         | HCO2198         | 1   | 50      | 1'    | 35        |
|                                | C1J1718         | TL2N3014        | 1   | 48      | 1'30" | 35        |
|                                | allC1J1922      | allC1N3120      | 1   | 52      | 1'30" | 35        |
|                                | C1J2441         | TKN3785         | 1   | 50      | 2'    | 35        |
|                                | C1J2441         | C2N3661         | 1   | 52      | 1'30" | 35        |
|                                | twilki0710cox1f | twilki0710cox1r | 1   | 52      | 45"   | 35        |
|                                | C1J2441         | TKN3785         | 1   | 50      | 2'    | 35        |
|                                | eoeh14for       | eoeh14rev       | 1   | 54      | 2'30" | 35        |
|                                | C2J3399         | A8N4061         | 1   | 48      | 1'    | 35        |
|                                | TKJ3790         | C3N4908         | 1   | 62      | 2'    | 35        |

**Table S1.A.8 PCR conditions used for mitochondrial genes**

| FW primer     | 5'-sequence-3'                   | RV primer    | 5'-sequence-3'             |
|---------------|----------------------------------|--------------|----------------------------|
| 071105for1    | ACTTTTGTATAACCGCAACT             | 071105rev2   | AATAAGCACAATAGTTTTTGA      |
| 16Sfor2       | GCAGCCCTTCAATCAA                 | 071105rev5   | TAGTACGAAAAGGAATGAATA      |
| A6J4463       | TTTATTCATATWATWCCNCAAGG          | 12Srev2      | TATTGCCCGTCGCTTT           |
| allC1J1922    | GGAATTTCHTCHATTTTAGG             | A6N4552m     | ATGTCTGCAATTATATTWGC       |
| allC2J3505    | TTTTACCMATAAAACAAYCAAATTC        | A8N4061      | GAAAATAAGTTWGTATCATTTTTCA  |
| allco1for     | CAGCTGAACATTCYTATAATGA           | allC1N3120   | AAAATAATTTGTTCTATTAARGG    |
| allnd5form    | ATTCTCTCAACCBAAATCAATAY          | allC3N4923   | TTACCTTGAAGDGTTCCTTCTCG    |
| C1J1718       | GGAGGATTTGAAAATTGATTAGTTCC       | allco3rev    | AWAYATCTCGYCATCATTGRTA     |
| C1J1751       | GGATCACCTGATATAGCATTCCC          | allcobrev    | GGRATAGATCGRAGAATTGC       |
| C1J2183       | CAACATTTATTTTGATTTTTTGG          | allnd1rev    | RCARCCTTTTTCWGATGCTATT     |
| C1J2441       | CCTACAGGAATTAATAATTTTAGATGATTAGC | allnd4rev    | AATTATTGGGGSTATRTKGGTTC    |
| C1J2792       | ATACCTCGACGTTATTCAGA             | C1N2353      | GCTCGTGATCAATATCTATWCC     |
| C2for2        | CCCATCAATAGGAGTAAAAG             | C1N2659      | GCTAATCCAGTGAATAATGG       |
| C2J3399       | TCTATCGGACAYCAATGATAYTG          | C1N2776      | GATAATCTGAATATCGWCGNGG     |
| C2J3624       | AATCCAGTTCGATTAAYCA              | C2N3661      | CCACAAATTTCTGAACATTGACCA   |
| C3if          | TATCAAAAAGGATTACGATGAGG          | C3ir         | CGTCAACAAAAGTGTCAATATCA    |
| CBJ10612      | CCATCCAACATCTCAGCATGATGAAA       | C3N4908      | CGTGAAAYATCTCGTCATCATTG    |
| CBJ10933      | TATGTACTACCATGAGGACAAATATC       | CBN11010     | TATCTACAGCAAATCCCCCTCA     |
| CBJ11335      | CAYATTCAACCTGAATGATA             | CBN11367     | ATTACACCTCCTAATTTATTAGGAAT |
| CBJ11485      | TTCAATTTTACCCTATTAAYCA           | CBN11526     | TTCTACAGGTCGRGCTCCGATYCA   |
| CBJ11545      | ACATGAATTGGAGCTCGACCAGT          | COIIIrev     | GACCATGAAATCCTGTTGCTAT     |
| eochl10for    | TCCAATCTTTCATACAAGTCA            | eochl14rev   | CAGCCTGATATTGGCATT         |
| eochl14for    | TTCCCCTATATTTTACCAG              | eochl7rev    | AAAAAGACGAGAAGACCCTA       |
| eochl9for     | TAAATATTTGCCGAATTCCT             | HCO2198      | TAAACTTCAGGGTGACCAAAAAATCA |
| LCO1490       | GGTCAACAAATCATAAAGATATTGG        | LRN12866     | ACATGATCTGAGTTCAAACCGG     |
| LRJ12887      | CCGGTCTGAACTCAGATCACGT           | LRN13000     | TTACCTTAGGGATAACAGCGTAA    |
| LRJ12888      | CCGGTTTGAACCTCARATCATGTA         | LRN13398     | CCCTTGTTTATCAAAAACAT       |
| LRJ13342      | CCTTTGTACRGTCAAAAATACYGC         | MPE_a_nad5   | CCTGTTTCTGCTTTAGTTCA       |
| LRJ13900      | TTTAATAAACYCTGATACAMAAG          | N1N12442     | AATTTGRGKATTAATTCCTT       |
| N1J12261m     | TACTTCGTAAGAAATGTTTGGAGC         | N1N12595     | GTAGCATTTTTAACTTTATTAGAACG |
| N1J12585m     | GGTCCTTTACGAATCTGAATATAACCT      | N4N8727      | AAATCTTTRATTGCTTATTCWTC    |
| N53f          | GCAGAAATACCAGCCATA               | N5N7211m     | TTAAAGCATTATTGTTTATGTGTGC  |
| N5J7077       | TTAAATCTTTWGARTAAAAYCC           | N5N7793      | TTGGGTTGRGATGGNYTAGG       |
| N5J7572       | AAAGGAATTTGAGCTCTTTTWTG          | nad5hwR      | TGGTTTGGGRTTRGTTTCTT       |
| N5J7806       | GAAACTAAACCCAAACCATCTCA          | nad5pbihR    | CATGGTTTATGTTCTTCTGG       |
| nad5hwF       | TAAAAMCCAGCTAAAAAWGG             | OC10rr       | TTAAATCAAATCAAGATGCAGA     |
| nad5pbihF     | AAATACACYCCCAATAAA               | ochl16Srev   | TAGATACGTGGTTTGTGTATCC     |
| nd1micro      | CCAATAAAAACCCCTAAAA              | pB12Srev     | AATTTTGGTGTTAAATAATTC      |
| OC7rr         | ATGCAACATTAACACGATTT             | pr8776       | TTTGTGGKGTCAAAAATATG       |
| ochl16S12Sfor | TTTCATCCAATCTTTCATACAA           | pth1612SAr   | AGTCTAATCTGCCCMCTGAT       |
| ochlcoBf1     | TTCCACCCATATTTTCTCTTA            | pth1612SBr   | AAATCAAATCAAGATGCAGA       |
| ochlNAD1for   | TAACTCTCTCACCTTCAGCA             | pther1612rev | TTTTATATTTTAGGGGATAAGC     |



**Table S1.A.10 PCR conditions used for mitochondrial genes**

| FW primer       | 5'-sequence-3'          | RV primer       | 5'-sequence-3'               |
|-----------------|-------------------------|-----------------|------------------------------|
| ochlNAD5for     | AGCAGAAATACCAGCCATAAGT  | SRN14220        | ATATGYACAYATTGCCCGTC         |
| pB12Sfor        | AATAGGGTATCTAATCCTAGTTT | SRN14588        | AAACTAGGATTAGATACCCTATTAT    |
| pf7925          | TTGTCTCAAAGTAGATAAAGCAA | SRN14745        | GTGCCAGCAGYYGCGGTTANAC       |
| PRND51r         | ATGGAATTCCACATAAAGCTAT  | tisp0710nd5r    | ATGGTTGGTCATGGCTTATG         |
| pth1612SAf      | AAAAATAAATCTCACCACAGG   | TKN3772         | GAGACCATTACTTGCTTTTCAGTCATCT |
| pth1612SBf      | AATCTTTCATWCAAGTCAYCAA  | TKN3785         | GTTTAAGAGACCAGTACTTG         |
| pth1612for      | AATCCTTCATTCAAGTCACC    | TKN3796         | ACTATAAAAATGGTTTAAAGAG       |
| SRJ14197        | GTACCYCTACTTTGTTACGACTT | TL2N3014        | TCCAATGCACTAATCTGCCATATTA    |
| SRJ14233        | AAGAGCGACGGGCGATGTGT    | TMN200          | TCCTTTATATTTGAGGATGARCC      |
| SRJ14610        | ATAATAGGGTATCTAATCCTAGT | tpea_0710nd5r   | GCTGCAATAACTAAAAGAGC         |
| TFJ6400         | TAATATCTTCAATRYYAARCTCT | tpea0710cob2r   | AGTTTGAAATGAAATGTTAATCG      |
| tisp0710nd5f    | CTCATATTTTTGACCCACACA   | tpin0710cobr    | AAAGTCTAATCTGCCACTGA         |
| TKJ3790         | CATTAGATGACTGAAAGCAAGTA | tpina6c3rev     | TCTTAAAATGGCAATAACATAAGA     |
| tpea0710cob2f   | ATCAGGGGGCAGATTAGACT    | trnand5rev      | AACTCATGCGATATTTAAAGC        |
| tpea0710nd5f    | GAAAAATAGGAACCACCCTAA   | TS1N11683       | TATTTCTTTATTATGTTTTCAAAAC    |
| tpin0710cobf    | CCAATTAACCCCAAAAA       | tsol16Srev      | TTTGAAATGAAATGTTAATCGT       |
| tpina6c3for     | TCCCTTTCATTTCTTTACCA    | ttun13740       | TTAAAAAGACGAGAAGACCCTA       |
| tsol16Sfor      | TTACGCTGTTATCCCTAAGGT   | ttun4540        | CATAATGGCAGAGAAATTGAGA       |
| ttun13206       | ATTAGAGGATCAACCAGCAACT  | ttun7806        | TTTTTGAGTGGGAAATTATTA        |
| ttun3900        | TTGCATTACCATCATTACGACT  | tuncobrevbis    | TTGTCCTGTAATAATGTAAGGTTC     |
| ttun6600        | TGATAACCCAGCACATATAAA   | twilki0710cobr  | ACAACCTTTTTTCAGATGCTA        |
| tuncobforbis    | AGGAACAGCCTTCATAGGAT    | twilki0710cox1r | AGCTCCTAAAATGGAGGAAA         |
| twilki0710cobf  | AGCCCGACCTGTTGAAGAC     | twilki0710nd5r  | AGTAAGATTTGTGATGGGAAT        |
| twilki0710cox1f | TTGTAACAGCCCATGCTTT     |                 |                              |
| twilki0710nd5f  | AGTAGGAGCAGCCATAGCC     |                 |                              |

|                       | Mix 1 | Mix 2 | AT = annealing Temperature in °C<br>EXT = Extension Time |
|-----------------------|-------|-------|----------------------------------------------------------|
| <b>Buffer 10X</b>     | 4µl   | 4µl   |                                                          |
| <b>MgCl2 25mM</b>     | 2µl   | 1,5µl |                                                          |
| <b>dNTP's 2mM</b>     | 1µl   | 1µl   |                                                          |
| <b>primer fw 10µM</b> | 1µl   | 0,8µl |                                                          |
| <b>primer rw 10µM</b> | 1µl   | 0,8µl |                                                          |
| <b>Taq (5U/µl)</b>    | 0,2µl | 0,2µl |                                                          |
| <b>DNA sample</b>     | 2µl   | 2µl   |                                                          |
| <b>H2O</b>            | 8,8µl | 9,7µl |                                                          |
| <b>TOTAL</b>          | 20µl  | 20µl  |                                                          |

**Table S1.B.1 PCR conditions used for nuclear genes**

| <i>Ochrogaster lunifer</i>         | gene            | forward primer | reverse primer | AT (°C) | EXT   | n° cycles |
|------------------------------------|-----------------|----------------|----------------|---------|-------|-----------|
|                                    | <i>EF</i>       | cho            | EFrcM4         | 61      | 1'15" | 30        |
|                                    |                 | EF1            | EF4b           | 51      | 2'    | 35        |
|                                    | <i>wingless</i> | LepWG1         | LepWG2         | 61      | 1'15" | 30        |
| <i>Thaumetopoea bonjeani</i>       | gene            | forward primer | reverse primer | AT (°C) | EXT   | n° cycles |
|                                    | <i>EF</i>       | cho            | EFrcM4         | 61      | 1'15" | 30        |
|                                    |                 | starsky        | luke           | 50      | 1'    | 35        |
|                                    |                 | tbonEFfor      | tbonEFrev      | 60      | 1'    | 35        |
| <i>wingless</i>                    | LepWG1          | LepWG2         | 62             | 1'15"   | 35    |           |
| <i>Thaumetopoea herculeana</i>     | gene            | forward primer | reverse primer | AT (°C) | EXT   | n° cycles |
|                                    | <i>EF</i>       | Cho            | EFrcM4         | 61      | 1'15" | 35        |
|                                    |                 | EF3            | EFrcM4         | 53      | 1'30" | 35        |
|                                    |                 | Efbtshfor      | EFrcM4         | 63      | 1'    | 35        |
|                                    |                 | pEF1for        | pEF1rev        | 54      | 50"   | 35        |
|                                    |                 | PtbonEFfor     | EF4b           | 55      | 1'    | 35        |
| <i>wingless</i>                    | LepWG1          | LepWG2         | 62             | 1'15"   | 35    |           |
| <i>Thaumetopoea ispartaensis</i>   | gene            | forward primer | reverse primer | AT (°C) | EXT   | n° cycles |
|                                    | <i>EF</i>       | cho            | EFrcM4         | 61      | 1'15" | 30        |
|                                    |                 | starsky        | luke           | 50      | 1'    | 35        |
|                                    | <i>wingless</i> | LepWG1         | LepWG2         | 61      | 1'15" | 30        |
| <i>Thaumetopoea libanotica</i>     | gene            | forward primer | reverse primer | AT (°C) | EXT   | n° cycles |
|                                    | <i>EF</i>       | cho            | EFrcM4         | 61      | 1'15" | 30        |
|                                    |                 | Plibpit5EFfor  | Plibpit5EFrev  | 55      | 1'    | 35        |
|                                    | <i>wingless</i> | LepWG1         | LepWG2         | 61      | 1'15" | 30        |
| <i>Thaumetopoea pinivora</i>       | gene            | forward primer | reverse primer | AT (°C) | EXT   | n° cycles |
|                                    | <i>EF</i>       | cho            | EFrcM4         | 61      | 1'15" | 30        |
|                                    |                 | starsky        | luke           | 50      | 1'    | 35        |
|                                    | <i>wingless</i> | LepWG1         | LepWG2         | 61      | 1'15" | 30        |
| <i>Thaumetopoea pityocampa</i>     | gene            | forward primer | reverse primer | AT (°C) | EXT   | n° cycles |
|                                    | <i>EF</i>       | cho            | EFrcM4         | 61      | 1'15" | 30        |
|                                    |                 | Plibpit5EFfor  | Plibpit5EFrev  | 55      | 1'    | 35        |
|                                    | <i>wingless</i> | LepWG1         | LepWG2         | 61      | 1'15" | 30        |
| <i>Thaumetopoea pityocampa</i> ENA | gene            | forward primer | reverse primer | AT (°C) | EXT   | n° cycles |
|                                    | <i>EF</i>       | Cho            | EFrcM4         | 61      | 1'15" | 35        |
|                                    |                 | Plibpit5EFfor  | Plibpit5EFrev  | 63      | 45"   | 35        |
|                                    | <i>wingless</i> | LepWG1         | LepWG2         | 61      | 1'15" | 30        |

**Table S1.B.2 PCR conditions used for nuclear genes**

| <i>Thaumetopoea processionea</i> | gene          | forward primer | reverse primer | AT (°C) | EXT   | n° cycles |
|----------------------------------|---------------|----------------|----------------|---------|-------|-----------|
| <i>EF</i>                        | cho           |                | EFrcM4         | 61      | 1'15" | 30        |
|                                  | EF1           |                | EF4b           | 51      | 2'    | 35        |
|                                  | Efbtshfor     |                | EFrcM4         | 63      | 1'    | 35        |
| <i>wingless</i>                  | LepWG1        |                | LepWG2         | 61      | 1'15" | 30        |
| <i>Thaumetopoea solitaria</i>    | gene          | forward primer | reverse primer | AT (°C) | EXT   | n° cycles |
| <i>EF</i>                        | EF1           |                | pEF1rev        | 53      | 1'30" | 35        |
|                                  | Plibpit5EFfor |                | pEF1rev        | 58      | 1'    | 35        |
|                                  | PtbonEFfor    |                | EF4b           | 55      | 1'    | 35        |
| <i>wingless</i>                  | LepWG1        |                | LepWG2         | 61      | 1'15" | 30        |
| <i>Thaumetopoea wilkinsoni</i>   | gene          | forward primer | reverse primer | AT (°C) | EXT   | n° cycles |
| <i>EF</i>                        | cho           |                | EFrcM4         | 61      | 1'30" | 30        |
|                                  | Plibpit5EFfor |                | Plibpit5EFrev  | 55      | 1'    | 35        |
| <i>wingless</i>                  | LepWG1        |                | LepWG2         | 61      | 1'15" | 30        |

**Table S1.B.3 PCR conditions used for nuclear genes****Primer forward**

|                       |                            |
|-----------------------|----------------------------|
| <b>Cho</b>            | GTCACCATCATYGACGC          |
| <b>EF1</b>            | GGCCACTTGATCTACAAAT        |
| <b>EF3</b>            | TCAAGAAAATYGGTTATAAC       |
| <b>Efbtshfor</b>      | GGAYTCCACTGAGCCCCCWTT      |
| <b>LepWG1</b>         | GARTGYAARTGYCAYGGYATGTCTGG |
| <b>pEF1for</b>        | ACYGGYCACTTGATCTAC         |
| <b>Plibpit5EFfor</b>  | CGACTCCGGCAAGTCCAC         |
| <b>PtbonEFfor</b>     | TTGAGGAAATCAAGAAAGAAG      |
| <b>starsky</b>        | CACATYACATTGTCGTSATYGG     |
| <b>tbonEFfor</b>      | CCCTGCTTGCTTTTACTACTT      |
| <b>Primer reverse</b> |                            |
| <b>EFrcM4</b>         | ACAGCVACKGTYTGYCTCATRTC    |
| <b>luke</b>           | CATRTTGTCCKCGTGCCAKCC      |
| <b>EF4b</b>           | GAGAGGAGGGAATTCCTTG        |
| <b>pEF1rev</b>        | AACAATAGTACCAGGCTTGAG      |
| <b>Plibpit5EFrev</b>  | AGCTGCTTTACACCAAGTG        |
| <b>tbonEFrev</b>      | TGCATCTCCACAGACTTGAC       |
| <b>LepWG2</b>         | ACTCGCARCACCARTGGAATGTRCA  |

**Mix**

AT = annealing Temperature in °C

EXT = Extension Time

|                              |              |
|------------------------------|--------------|
| <b>Buffer 10X</b>            | <b>4µl</b>   |
| <b>MgCl<sub>2</sub> 25mM</b> | <b>2µl</b>   |
| <b>dNTP's 2mM</b>            | <b>1µl</b>   |
| <b>primer fw 10µM</b>        | <b>1µl</b>   |
| <b>primer rw 10µM</b>        | <b>1µl</b>   |
| <b>Taq (5U/µl)</b>           | <b>0,2µl</b> |
| <b>DNA sample</b>            | <b>2µl</b>   |
| <b>H<sub>2</sub>O</b>        | <b>8,8µl</b> |
| <b>TOTAL</b>                 | <b>20µl</b>  |
