# Supplementary material for: Host and Phenology Shifts in the Evolution of the Social Moth Genus Thaumetopoea
Source: PubMed Central journal article supplement (PMC3584119; doi:10.1371/journal.pone.0057192), 2013-02-27
Supplement: pone.0057192.s004.pdf [file pone.0057192.s004.pdf]

Table S2.A. List of traits analysed in *Thaumetopoea* genus. Species used for the analysis (1<sup>st</sup> part).

| Trait                      | <i>T. bonjeani</i> | <i>T. herculeana</i>        | <i>T. ispartaensis</i>      | <i>T. libanotica</i>        | <i>T. pinivora</i>        | <i>T. pityocampa</i>                       | <i>T. pityocampa</i> ENA |
|----------------------------|--------------------|-----------------------------|-----------------------------|-----------------------------|---------------------------|--------------------------------------------|--------------------------|
| <b>Biogeography</b>        |                    |                             |                             |                             |                           |                                            |                          |
| distribution               | localized          | localized                   | localized                   | localized                   | localized                 | widespread                                 | widespread               |
| region                     | North West Africa  | West Mediterranean          | East Mediterranean          | East Mediterranean          | North Europe, West Europe | South Europe, North-West Africa, West Asia | North-East Africa        |
| zoogeographic distribution | Mediterranean      | Mediterranean               | Mediterranean, Iranoturanic | Mediterranean, Iranoturanic | Eurosibiric               | Mediterranean, Eurosibiric                 | Mediterranean            |
| <b>Host plant</b>          |                    |                             |                             |                             |                           |                                            |                          |
| host group                 | Gymnosperm         | Angiosperm                  | Gymnosperm                  | Gymnosperm                  | Gymnosperm                | Gymnosperm                                 | Gymnosperm               |
| host family                | Pinaceae           | Cistaceae                   | Pinaceae                    | Pinaceae                    | Pinaceae                  | Pinaceae                                   | Pinaceae                 |
| host genus                 | <i>Cedrus</i>      | <i>Helianthemus, Cistus</i> | <i>Cedrus</i>               | <i>Cedrus</i>               | <i>Pinus</i>              | <i>Pinus, Cedrus</i>                       | <i>Pinus, Cedrus</i>     |
| anti-herbivore chemicals   | present            | present                     | present                     | present                     | present                   | present                                    | present                  |
| eaten foliage by larvae    | mature             | young                       | mature                      | mature                      | mature                    | mature                                     | mature                   |
| <b>Ecology</b>             |                    |                             |                             |                             |                           |                                            |                          |
| foraging strategy          | patch-restricted   | nomadic                     | patch-restricted            | patch-restricted            | patch-restricted          | central place                              | central place            |
| silk tent                  | scarce             | scarce                      | scarce                      | scarce                      | scarce                    | abundant                                   | abundant                 |
| gregariousness as larva    | present            | present                     | present                     | present                     | present                   | present                                    | present                  |
| procession                 | present            | present                     | present                     | present                     | present                   | present                                    | present                  |
| pupation site              | soil               | soil                        | soil                        | soil                        | soil                      | soil                                       | soil                     |
| overwintering stage        | egg                | egg                         | egg                         | egg                         | egg                       | larva                                      | larva                    |
| diapause                   | present            | present                     | present                     | present                     | present                   | present                                    | present                  |
| <b>Morphology</b>          |                    |                             |                             |                             |                           |                                            |                          |
| front of adult             | crested            | crested                     | crested                     | crested                     | crested                   | crested                                    | crested                  |
| fore tibia                 | with spine         | with spine                  | with spine                  | with spine                  | with spine                | with spine                                 | with spine               |
| egg scales                 | present            | present                     | present                     | Present                     | present                   | present                                    | present                  |
| egg scale length mm        | 1.91               | 1.5                         | 1.7                         | 1.74                        | 1.62                      | 2.94                                       | 2.88                     |
| egg scale width mm         | 0.72               | 0.34                        | 0.94                        | 0.85                        | 0.81                      | 1.63                                       | 1.67                     |
| egg scale type             | medium/medium      | medium/narrow               | medium/medium               | medium/medium               | medium/medium             | long/wide                                  | long/wide                |
| urticating setae on larvae | present            | present                     | present                     | present                     | present                   | present                                    | present                  |
| urticating setae on moth   | absent             | absent                      | absent                      | absent                      | absent                    | absent                                     | absent                   |

Table S2. B. List of traits analysed in *Thaumetopoea* genus. Species used for the analysis (2<sup>nd</sup> part) and outgroups.

| Trait                      | <i>T. processionea</i>     | <i>T. solitaria</i>         | <i>T. wilkinsoni</i> | <i>O. lunifer</i> | <i>H. cunea</i> | <i>L. dispar</i>       |
|----------------------------|----------------------------|-----------------------------|----------------------|-------------------|-----------------|------------------------|
| <b>Biogeography</b>        |                            |                             |                      |                   |                 |                        |
| distribution               | widespread                 | localized                   | widespread           | localized         | widespread      | widespread             |
| region                     | Europe                     | East Mediterranean          | East Mediterranean   | Australia         | North America   | Europe, Asia           |
| zoogeographic distribution | Mediterranean, Eurosibiric | Mediterranean, Iranoturanic | Mediterranean        | Australian        | Nearctic        | Eurosibiric            |
| <b>Host plant</b>          |                            |                             |                      |                   |                 |                        |
| host group                 | Angiosperm                 | Angiosperm                  | Gymnosperm           | Angiosperm        | Angiosperm      | Angiosperm, Gymnosperm |
| host family                | Fagaceae                   | Anacardiaceae               | Pinaceae             | Leguminosae       | polyphagous     | very polyphagous       |
| host genus                 | <i>Quercus</i>             | <i>Pistacia</i>             | <i>Pinus, Cedrus</i> | <i>Acacia</i>     | polyphagous     | very polyphagous       |
| anti-herbivore chemicals   | absent                     | present                     | present              | present           | absent          | absent                 |
| eaten foliage by larvae    | young                      | young                       | mature               | young             | young           | young                  |
| <b>Ecology</b>             |                            |                             |                      |                   |                 |                        |
| foraging strategy          | central place              | patch-restricted            | central place        | central place     | nomadic         | nomadic                |
| silk tent                  | abundant                   | scarce                      | abundant             | abundant          | abundant        | absent                 |
| gregariousness as larva    | present                    | present                     | present              | present           | absent          | absent                 |
| procession                 | present                    | present                     | present              | present           | absent          | absent                 |
| pupation site              | nest                       | litter                      | soil                 | litter            | litter          | litter                 |
| overwintering stage        | egg                        | egg                         | larva                | prepupa           | pupa            | egg                    |
| diapause                   | present                    | present                     | present              | absent            | absent          | absent                 |
| <b>Morphology</b>          |                            |                             |                      |                   |                 |                        |
| front of adult             | smooth                     | smooth                      | crested              | smooth            | smooth          | smooth                 |
| fore tibia                 | without spine              | without spine               | with spine           | without spine     | without spine   | without spine          |
| egg scales                 | present                    | present                     | present              | present, diverse  | absent, hairs   | absent, hairs          |
| egg scale length mm        | 0.73                       | 1.5                         | 2.38                 | 1.4               |                 |                        |
| egg scale width mm         | 0.15                       | 0.47                        | 1.59                 | 0.2               |                 |                        |
| egg scale type             | short/narrow               | medium/narrow               | long/wide            | medium/narrow     |                 |                        |
| urticating setae on larvae | present                    | present                     | present              | absent            | absent          | absent                 |
| urticating setae on moth   | absent                     | absent                      | absent               | present           | absent          | absent                 |

Table S2.C. List of traits analysed in *Thaumetopoea* genus. Species not included in the analysis

| Trait                      | <i>T. apologetica</i> | <i>T. cheela</i>    | <i>T. dhofarensis</i> | <i>T. jordana</i>      | <i>T. pseudosolitaria</i>   | <i>T. sedirica</i> | <i>T. torosica</i> |
|----------------------------|-----------------------|---------------------|-----------------------|------------------------|-----------------------------|--------------------|--------------------|
| <b>Biogeography</b>        |                       |                     |                       |                        |                             |                    |                    |
| distribution               | localized             | localized           | localized             | localized              | Localized                   | localized          | localized          |
| region                     | East Africa           | India               | Arabic peninsula      | East Mediterranean     | East Mediterranean          | East Mediterranean | East Mediterranean |
| zoogeographic distribution | African               | Iranoturanic        |                       | Saharo-arabian         | Mediterranean, Iranoturanic | Mediterranean      | Mediterranean      |
| <b>Host plant</b>          |                       |                     |                       |                        |                             |                    |                    |
| host group                 | *                     | Angiosperm          | *                     | Angiosperm             | Angiosperm                  | Gymnosperm         | Gymnosperm         |
| host family                | *                     | Anacardiaceae       | *                     | Anacardiaceae          | Fagaceae                    | Pinaceae           | Pinaceae           |
| host genus                 | *                     | <i>Rhus cotinus</i> | *                     | <i>Rhus tripartita</i> | <i>Quercus</i>              | Pinus              | <i>Pinus</i>       |
| anti-herbivore chemicals   | *                     | *                   | *                     | present                | absent                      | present            | present            |
| eaten foliage by larvae    | *                     | *                   | *                     | young                  | young                       | *                  | *                  |
| <b>Ecology</b>             |                       |                     |                       |                        |                             |                    |                    |
| foraging strategy          | *                     | *                   | *                     | *                      | *                           | *                  | *                  |
| silk tent                  | *                     | *                   | *                     | scarce                 | *                           | *                  | *                  |
| gregariousness as larva    | *                     | *                   | *                     | present                | present                     | *                  | *                  |
| procession                 | *                     | *                   | *                     | present                | present                     | *                  | *                  |
| pupation site              | *                     | *                   | *                     | *                      | *                           | *                  | *                  |
| overwintering stage        | *                     | *                   | *                     | larva                  | egg                         | *                  | *                  |
| diapause                   | *                     | *                   | *                     | present                | *                           | *                  | *                  |
| <b>Morphology</b>          |                       |                     |                       |                        |                             |                    |                    |
| front of adult             | crested               | crested             | crested               | crested                | smooth                      | *                  | *                  |
| fore tibia                 | *                     | *                   | *                     | with spine             | without spine               | *                  | *                  |
| egg scales                 | *                     | *                   | *                     | present                | *                           | *                  | *                  |
| egg scale length mm        | *                     | *                   | *                     | 3                      | *                           | *                  | *                  |
| egg scale width mm         | *                     | *                   | *                     | 0,48                   | *                           | *                  | *                  |
| egg scale type             | *                     | *                   | *                     | long/narrow            | *                           | *                  | *                  |
| urticating setae on larvae | *                     | *                   | *                     | present                | present                     | *                  | *                  |
| urticating setae on moth   | *                     | *                   | *                     | absent                 | absent                      | *                  | *                  |

\*, not available

**List of References consulted to produce the Table S2.**

- Agenjo R. 1941. Monografía de la familia Thaumetopoeidae (Lep.). *Eos* **17**:69-130.
- Androic M. 1956. Contribution à l'étude de *Cnethocampa pityocampa* Schiff. *Revue de Pathologie Végétale et d'Entomologie Agricole de France* **35**:251-262.
- Avtzis N. 1986. Development of *Thaumetopoea pityocampa* schiff. (Lepidoptera: Thaumetopoeidae) in relation to food consumption. *Forest Ecology and Management* **15**:65-68.
- Avtzis N. 1997. Occurrence of the pine processionary (*Thaumetopoea pityocampa* Schiff., Lep.: Thaumetopoeidae) in Greece. *Mitteilungen der Deutschen Gesellschaft für Allgemeine und Angewandte Entomologie* **11**:699-703.
- Buxton RD. 1990. The influence of host tree species on timing of pupation of *Thaumetopoea pityocampa* Schiff. (Lep., Thaumetopoeidae) and its exposure to parasitism by *Phryxe caudata* Rond. (Dipt., Larvaevoridae) *Journal of Applied Entomology* **109**:302-310.
- Ciesla WM. 2004. Forests and forest protection in Cyprus. *Forestry Chronicle* **80**:107-113.
- de Freina J, Witt JT. 1982. Taxonomische Veränderungen bei den Bombyces und Sphinges Europas und Nordwestafrikas (Lepidoptera: Thaumetopoeidae, Ctenuchidae). *Atalanta* **13**:309-317.
- de Freina J, Witt TJ. 1987. Die Bombyces und Sphinges der Westpalaerktis (Insecta, Lepidoptera) 1. Forschung und Wissenschaft, München. 708 pages, 46 col plates, 330 maps.
- Demolin G. 1988. Intensification de la protection phytosanitaire des forêts. Algérie 1986-1987. La processionnaire du cèdre: *Thaumetopoea bonjeani*. FAO - Rapport scientifique et rapport iconographique, Rome.
- Demolin G, Frerot B, Chambon JP, Martin E. 1994. Reflexion biosystematiques sur toutes le processionnaires du genre *Thaumetopoea* (Lep. Thaumetopoeidae), considérées comme ravageurs importants des cèdres *Cedrus libani* Barel et *Cedrus atlantica* Manetti sur le pourtour du bassin mediterraneen. *Annales des Recherches Forestières Maroc* **2**:577-591.
- Demolin G, Nemer N, Villemant C. 1999. Defoliator insects of *Quercus callyprinos* Webb. and *Quercus infectoria* Oliv. in Lebanon. *Bulletin OILB/SROP* **22**:65-69.
- Devkota B, Schmidt GH. 1990. Larval development of *Thaumetopoea pityocampa* (Den and Schiff) (Lep, Thaumetopoeidae) from Greece as influenced by different host plants under laboratory conditions. *Journal of Applied Entomology-Zeitschrift Fur Angewandte Entomologie* **109**:321-330.
- Doganlar M, Avci M. 2001. A new species of *Traumatocampa* Wallengren (Lepidoptera: Thaumetopoeidae) feeding on cedar from Isparta (Turkiye). *Turkiye Entomoloji Dergisi* **25**:19-22.
- Doganlar M, Doganlar O, Doganlar F. 2005. Morphology and systematics of European species of *Traumatocampa* Wallengren, 1871 with descriptions of two new species from the Mediterranean region of Turkey (Lepidoptera, Thaumetopoeidae). *Entomofauna Zeitschrift fur Entomologie* **26**:229-240.
- El Yousfi M. 1989. The cedar processionary moth, *Thaumetopoea bonjeani* (Powell). Boletín de Sanidad Vegetal, Plagas **15**:43-56.
- Frerot B, Demolin G. 1993. Sex pheromone of processionary moths and biosystematic considerations within the genus *Thaumetopoea* (Thaumetopoeidae Thaumetopocinae). *Bollettino di Zoologia Agraria e di Bachicoltura* **25**:33-40.
- Furth DG, Halperin J. 1979. Observations on the phenology and biogeography of *Thaumetopoea jordana* (Staudinger) (Lepidoptera Thaumetopoeidae). *Israel Journal of Entomology* **13**:1-11.
- Gabler H. 1954. Prozessionspinner. Ziemsen, Wittenburg.
- Gomez-Bustillo MR, Bustillo MG. 1978. The Thaumetopoeidae (Aurivillius, 1891) of the Iberian peninsula: notes on systematics, ecology and the economic importance of the family. (Second part). *Revista de Lepidopterologia, SHILAP* **6**:113-124.
- Grison P, de Sacy SR, Galichet PF. 1951. La processionnaire du pin (*Thaumetopoea pityocampa* Schiff.). *Revue de Zoologie Agricole et Appliquée* **50**:1-33.
- Halperin J. 1990. Life history of *Thaumetopoea* spp. (Lep., Thaumetopoeidae) in Israel. *Journal of Applied Entomology* **110**:1-6.
- Halperin J, Sauter W. 1999. The occurrence of *Thaumetopoea processionea* L. (Lep.: Thaumetopoeidae) on Mt. Hermon. *Phytoparasitica* **27**:107.
- Hódar JA, Zamora R. 2004. Herbivory and climatic warming: a Mediterranean outbreaking caterpillar attacks a relict, boreal pine species. *Biodiversity and Conservation* **13**:493-500.
- Hódar JA, Zamora R, Castro J. 2002. Host utilisation by moth and larval survival of pine processionary caterpillar *Thaumetopoea pityocampa* in relation to food quality in three *Pinus* species. *Ecological Entomology* **27**:292-301.
- Huchon H, Demolin G. 1971. The bioecology of the Pine processionary [*Thaumetopoea pityocampa*]. Potential and current distribution. *Phytoma* **23**:11-20.
- Kerdelhué C, Zane L, Simonato M, Salvato P, Rousselet J., Roques A, Battisti A. 2009. Quaternary history and contemporary patterns in a currently expanding species. *BMC Evolutionary Biology* **9**.
- Kiriakoff SG. 1970. Lepidoptera Familia Thaumetopoeidae. in P. Wytzman, editor. Genera Insectorum. SPRL, Anvers Belgium.
- Kiriakoff SG, Talhouk AS. 1975. *Thaumetopoea libanotica* spec.nov. *Opuscula Zoologica* **137**:1-5.
- Koch, M. 1953. Zur Biologie des Kiefernprozessionspinner, *Thaumetopoea pinivora* Tr. . *Beitrag Entomologie* **4**:423-427.
- Lamy M, Novak F. 1987. The oak processionary caterpillar (*Thaumetopoea processionea* L.) an urticating caterpillar related to the pine processionary caterpillar (*Thaumetopoea pityocampa* Schiff.) (Lepidoptera, Thaumetopoeidae). *Experientia* **43**:456-458.
- Mendel Z. 1987. Major pests of man-made forests in israel: origin, biology, damage and control. *Phytoparasitica* **15**:131-137.
- Mendel Z. 1988. Host selection by the pine processionary caterpillar *Thaumetopoea wilkinsoni*. *Phytoparasitica* **16**:101-108.
- Paiva MR, Mateus E, Santos MH, Branco MR. 2011. Pine volatiles mediate host selection for oviposition by *Thaumetopoea pityocampa* (Lep., Notodontidae). *Journal of Applied Entomology* **135**:195-203.
- Palanca SA, Castan LC, Calle PJ, Soler AP, Lanaspá CC, Pascual JC. 1982. *Thaumetopoea galaica*, a species new to science (preliminary note). *Revista de Lepidopterologia, SHILAP* **38**:92.
- Pérez-Contreras T, Soler JJ, Soler M. 2003. Why do pine processionary caterpillars *Thaumetopoea pityocampa* (Lepidoptera, Thaumetopoeidae) live in large groups? An experimental study. *Annales Zoologici Fennici* **40**:505-515.
- Petrakis PV, Roussis V, Papadimitriou D, Vagias C, Tsitsimpikou C. 2005. The effect of terpenoid extracts from 15 pine species on the feeding behavioural sequence of the late instars of the pine processionary caterpillar *Thaumetopoea pityocampa*. *Behavioural Processes* **69**:303-322.
- Pimentel C, Calvão T, Ayres MP. 2011. Impact of climatic variation on populations of pine processionary moth *Thaumetopoea pityocampa* in a core area of its distribution. *Agricultural and Forest Entomology* **13**:273-281.
- Ronnäs C, Larsson S, Pitacco A, Battisti A. 2010. Effects of colony size on larval performance in a processionary moth. *Ecological Entomology* **35**:436-445.
- Rousselet J., R. Zhao, D. Argal, M. Simonato, A. Battisti, A. Roques, and C. Kerdelhué. 2010. The role of topography in structuring the demographic history of the pine processionary moth, *Thaumetopoea pityocampa* (Lepidoptera: Notodontidae). *Journal of Biogeography* **37**:1478-1490.
- Santos H, Burbán C, Rousselet J, Rossi JP, Branco M, Kerdelhué C. 2011. Incipient allochronic speciation in the pine processionary moth (*Thaumetopoea pityocampa*, Lepidoptera, Notodontidae). *Journal of Evolutionary Biology* **24**:146-158.
- Schmidt GH. 1990. On the biology and control of *Thaumetopoea* spp. (Lepidoptera, Insecta). Proceedings of the *Thaumetopoea*-Symposium 5-7 July 1989 at Neustadt a.Rbge near Hannover.
- Schopf R, Avtzis N. 1987. The importance of needle compounds on the predisposition of 5 pine species to the attack by *Thaumetopoea pityocampa* (Schiff.). *Journal of Applied Entomology-Zeitschrift Fur Angewandte Entomologie* **103**:340-350.
- Simonato M, Mendel Z, Kerdelhué C, Rousselet J, Magnoux E, Salvato P, Roques A, Battisti A, Zane L. 2007. Phylogeography of the pine processionary moth *Thaumetopoea wilkinsoni* in the Near East. *Molecular Ecology* **16**:2273-2283.
- Tams WHT. 1925. A new processionary moth (Notodontidae) injurious to pine trees in cyprus. *Bulletin of entomological research* **15**:293-294.
- Wilkinson DS. 1926. The Cyprus processionary caterpillar (*Thaumetopoea wilkinsoni*, Tams). *Bulletin of entomological research* **18**:163-182.
